# Supplementary material for: Development of CS-TPP-dsRNA nanoparticles to enhance RNAi efficiency in the yellow fever mosquito, Aedes aegypti
Source: PubMed Central journal article supplement (PMC6584730; doi:10.1038/s41598-019-45019-z), 2019-06-19
Supplement: 41598_2019_45019_MOESM1_ESM.pdf [file 41598_2019_45019_MOESM1_ESM.pdf]

## Supplementary Information

### Development of CS-TPP-dsRNA nanoparticles to enhance RNAi efficiency in the yellow fever mosquito, *Aedes aegypti*

Ramesh Kumar Dhandapani, Dhandapani Gurusamy, Jeffrey L. Howell and Subba Reddy Palli\*

Table S1 Formation of the chitosan and TPP nanoparticles

| CS (mg/ml) | TPP (mg/ml) |     |      |    |      |     |
|------------|-------------|-----|------|----|------|-----|
|            | 0.25        | 0.5 | 0.75 | 1  | 1.25 | 1.5 |
| 1 mg       | ++          | ++  | ++   | ++ | --   | --  |
| 3 mg       | xx          | xx  | ++   | ++ | ++   | ++  |
| 5 mg       | xx          | xx  | ++   | ++ | ++   | ++  |
| 7 mg       | xx          | xx  | xx   | ++ | ++   | ++  |

++, opalescent suspension; xx, Clear solution; --, aggregates

Table S2 DLS analysis of CS-TPP nanoparticles

| Ratio        | Size        | Charge     | PDI        |
|--------------|-------------|------------|------------|
| CS-TPP (1:1) | 160±3.21    | 1.97±0.29  | 0.45±0.018 |
| CS-TPP (3:1) | 171±2.31    | 13.97±1.51 | 0.29±0.021 |
| CS-TPP (5:1) | 115±3.71    | 48.67±1.71 | 0.19±0.023 |
| CS-TPP (7:1) | 186.67±2.96 | 65.73±1.68 | 0.51±0.015 |

Table S3 DLS analysis of CS-TPP-dsRNA nanoparticles

| <b>Ratio</b>       | <b>Size (nm)</b> | <b>Charge (mv)</b> | <b>PDI</b> | <b>Percent dsRNA incorporated</b> |
|--------------------|------------------|--------------------|------------|-----------------------------------|
| CS-TPP-dsRNA (1:1) | 242.67±4.06      | -18.37±1.97        | 0.31±0.04  | 32±2.31                           |
| CS-TPP-dsRNA (3:1) | 263.33±5.61      | 11±0.93            | 0.39±0.02  | 61.67±2.03                        |
| CS-TPP-dsRNA (5:1) | 181.67±3.48      | 34.37±0.94         | 0.26±0.02  | 81.33±2.03                        |
| CS-TPP-dsRNA (7:1) | 3157±9.29        | 47.57±1.25         | 0.46±0.03  | 68±1.73                           |

Table S4. List of primers used in this study. All primers except those labeled as qPCR were used for dsRNA synthesis.

| S. No | Genes  | Primer sequences (5'-3')                                         | Amplicon Size (bp) | Accession No   | References |
|-------|--------|------------------------------------------------------------------|--------------------|----------------|------------|
| 1.    | EGFP   | FP: CGATGCCACCTACGGCAA<br>RP: TGTCGCCCTCGAACTTCA                 | 248                |                |            |
| 2.    | IAP1   | FP: CTTCTGCCGAGTGGAAATCGG<br>RP: ATATTCCGGTAGCTTCTGTTG           | 349                | DQ993355.1     | 47         |
|       |        | qPCR-FP: GTGTTTGGCCAAGAAGGAAAG<br>qPCR-RP: TGA CTGAAGCGAGGATGTTG | 118                |                |            |
| 3.    | SNF7   | FP: ACGATGTCCACGAGATGATG<br>RP: CAGGCAGATCGGTTGCT                | 222                | XM_001659907.2 | 52         |
| 4.    | SRC    | FP: CGTCAAATGCAGCAGATCACCCAA<br>RP: TGTTGGTTGTTTCGAGGGAGAAGGT    | 431                | XM_021845577.1 |            |
| 5.    | SSK    | FP: TCATCTACCGAACGGGCTA<br>RP: TTCTCTCCGAGGTGATGTG               | 303                | XM_021848746.1 | 56         |
| 6.    | MESH   | FP: TGGAACGGTAGTCAACATCA<br>RP: CCCACAGCGAGATCTGAAC              | 350                | XM_021840549.1 |            |
| 7.    | HEL25E | FP: CAAGCTGTGCTAGGAATGGA<br>RP: CGAGAATGAAATGCTTCAGGTG           | 355                | XM_001658256.2 |            |
| 8.    | SAC1   | FP: ATACGGTCGACAGGTTCTGG<br>RP: CAGACGTTCTTGAACAGCCA             | 420                | XM_001658506.2 | 57         |
| 9.    | LRC    | FP: GCCAGACTTGAGCAAACCTC<br>RP: TTGTTGTTTGGCGTTAGCAG             | 327                | XM_001658387.2 |            |
| 10.   | OTK    | FP: GGTGCTGACCGAGGTACATT<br>RP: AGGACTTTTCCGGTAGGCAT             | 338                | XM_021853098.1 |            |
| 11.   | S7RP   | qPCR-FP: ACCGCCGTCTACGATGCCA<br>qPCR-RP: ATGGTGGTCTGCTGGTTCTT    | 131                | CR938234.1     | 58         |

## Figures

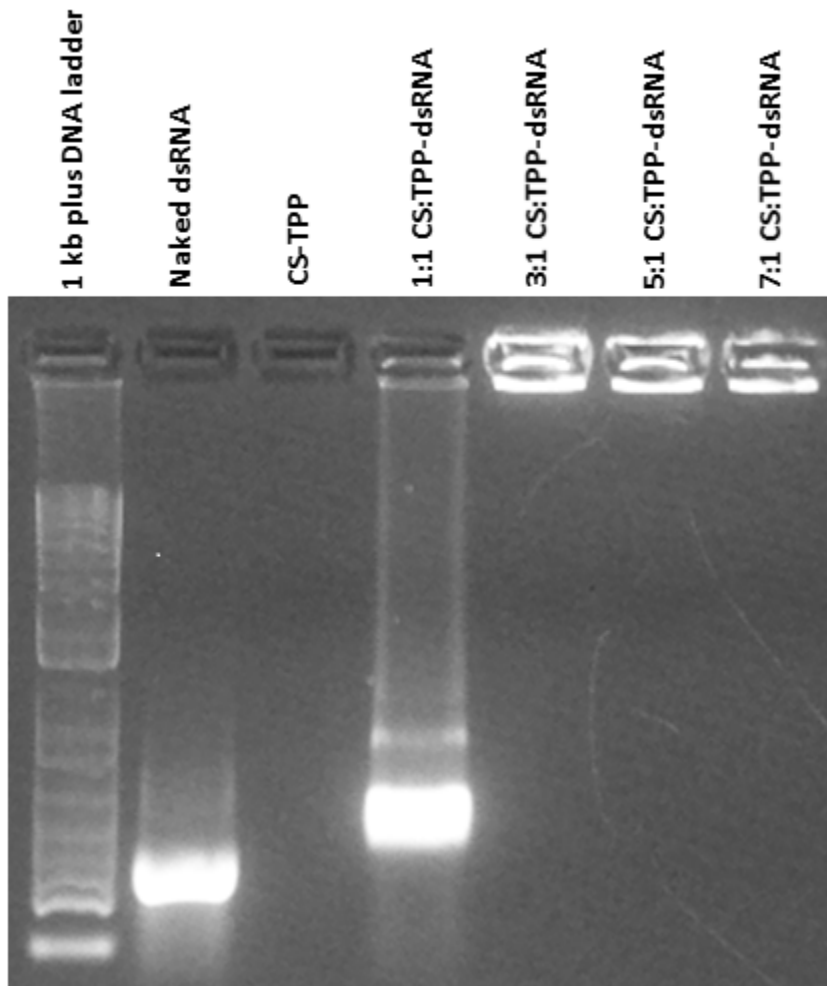

**Fig S1 Gel retardation assay of nanoparticle complexes formed with different ratios of chitosan (CS).** TPP and dsRNA were conjugated with different ratios of chitosan and analyzed by gel electrophoresis.

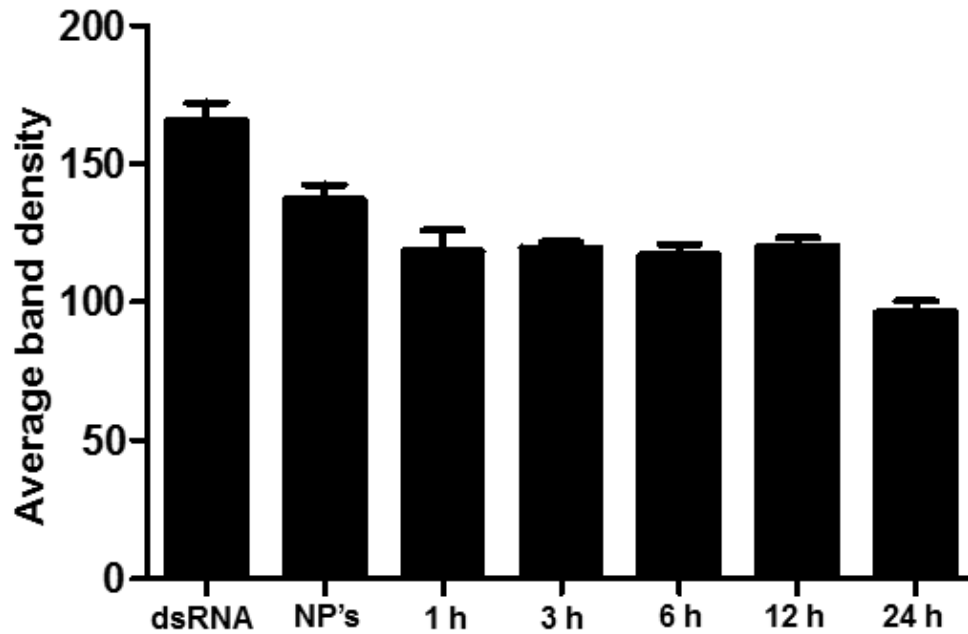

**Fig S2 Stability of CS-TPP-dsRNA nanoparticle complexes exposed to lumen contents of mosquito larvae.** CS-TPP-dsRNA nanoparticles were exposed to lumen contents collected from *Aedes aegypti* larvae. At 1, 3, 6, 12 and 24 h after mixing dsRNA and lumen contents, the samples were collected and analyzed in agarose gels. The gels were stained with GelRed® and photographed under UV light. The bands from scanned gel images were quantified and Mean+SE (n=3) are shown.

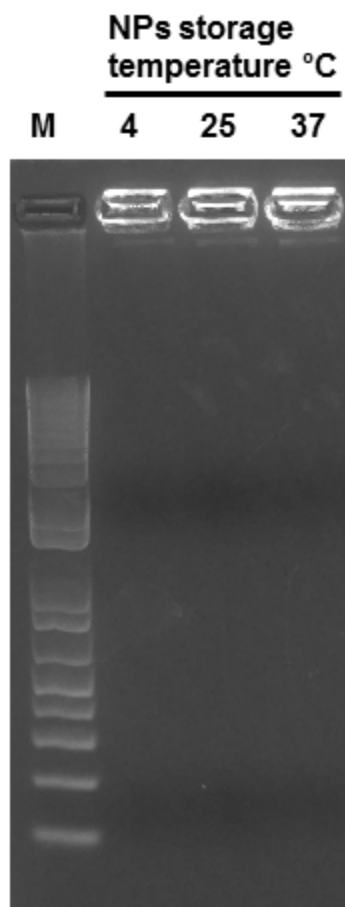

**Fig S3 Storage stability of CS-TPP-dsRNA nanoparticles.** NPs were prepared and stored at 4, 25 and 37°C for 10 days and analyzed by gel electrophoresis. M, 1 kb plus DNA ladder.

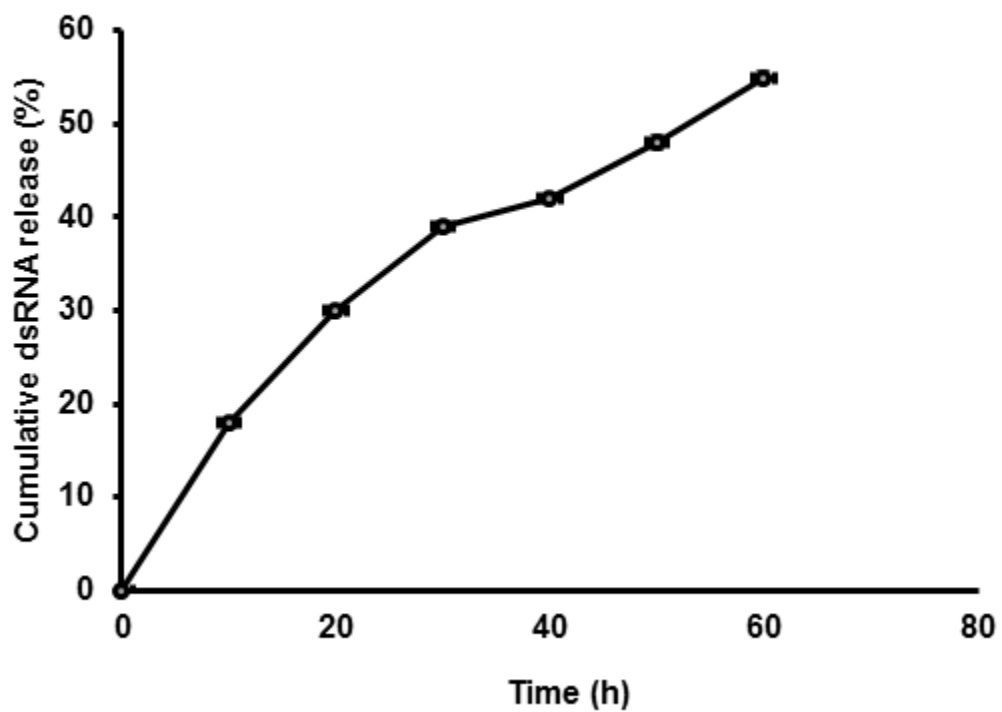

**Fig S4 The profile of cumulative dsRNA release.** CS-TPP-dsRNA NPs were incubated in 1X PBS buffer, pH 7.4, for different time intervals. The dsRNA released was quantified. The data shown are Mean  $\pm$  SE (n=3).
